# Supplementary material for: Di-tert-butylcatecholate derivatives of titanocene
Source: Royal Society of Chemistry journal article supplement (doi:10.1039/c9nj00771g), 2019-01-01
Supplement: c9nj00771g1.pdf [file c9nj00771g1.pdf]

Supporting Information

## Di-*tert*-butylcatecholate derivatives of titanocene

Pavel A. Petrov,<sup>\*ab</sup> Taisiya S. Sukhikh,<sup>ab</sup> Vladimir A. Nadolnny,<sup>a</sup>  
Artem S. Bogomyakov,<sup>c</sup> Yuliya A. Laricheva<sup>a</sup> and Alexandr V. Piskunov<sup>d</sup>

<sup>a</sup> Nikolaev Institute of Inorganic Chemistry, Siberian Branch of Russian Academy of Sciences, Novosibirsk, Russia

<sup>b</sup> Novosibirsk State University, Novosibirsk, Russia

<sup>c</sup> International Tomography Centre, Siberian Branch of Russian Academy of Sciences, Novosibirsk, Russia

<sup>d</sup> G.A. Razuvaev Institute of Organometallic Chemistry, Russian Academy of Sciences, Nizhny Novgorod, Russia

### Contents

|                                                                                                |    |
|------------------------------------------------------------------------------------------------|----|
| Table S1. Crystal Data and Data Collection and Refinement Details                              | 2  |
| Fig. S1, S2. ESR spectra of <b>2</b>                                                           | 3  |
| Fig. S3. $\mu_{\text{eff}}$ vs. T plot for the polycrystalline sample of complex <b>2</b>      | 4  |
| Fig. S4. Structure of model complex <b>2m</b> used for DFT calculations                        | 4  |
| Fig. S5. Critical points of electron density in complex <b>2m</b>                              | 5  |
| Table S2. The energy values (eV) and occupations (electrons) of frontier orbitals of <b>2m</b> | 6  |
| Table S3. Hirshfeld and Bader charge analysis of <b>2m</b>                                     | 6  |
| Table S4. BCP properties for Ti bonds                                                          | 7  |
| Tables S5–S7. Cartesian coordinates (in Å) of <b>2m</b>                                        | 11 |
| References                                                                                     | 20 |

**Table S1. Crystal Data and Data Collection and Refinement Details**

|                                                                                                       | <b>1</b>                                                          | <b>2</b>                                                            |
|-------------------------------------------------------------------------------------------------------|-------------------------------------------------------------------|---------------------------------------------------------------------|
| Chemical formula                                                                                      | C <sub>24</sub> H <sub>30</sub> O <sub>2</sub> Ti                 | C <sub>43</sub> H <sub>55</sub> O <sub>4</sub> Ti <sub>2</sub>      |
| <i>M<sub>r</sub></i>                                                                                  | 398.38                                                            | 731.67                                                              |
| Crystal system, space group                                                                           | Orthorhombic, <i>Pnma</i>                                         | Monoclinic, <i>P2<sub>1</sub></i>                                   |
| Temperature (K)                                                                                       | 150                                                               | 173                                                                 |
| <i>a</i> (Å)                                                                                          | 14.9844(6)                                                        | 10.1699(18)                                                         |
| <i>b</i> (Å)                                                                                          | 17.5943(7)                                                        | 32.789(6)                                                           |
| <i>c</i> (Å)                                                                                          | 7.8829(3)                                                         | 11.604(2)                                                           |
| β (°)                                                                                                 | 90                                                                | 96.672(4)                                                           |
| <i>V</i> (Å <sup>3</sup> )                                                                            | 2078.25(14)                                                       | 3843.3(12)                                                          |
| <i>Z</i>                                                                                              | 4                                                                 | 4                                                                   |
| μ (mm <sup>-1</sup> )                                                                                 | 0.43                                                              | 0.46                                                                |
| Crystal size (mm)                                                                                     | 0.42 × 0.40 × 0.40                                                | 0.25 × 0.12 × 0.10                                                  |
| <i>F</i> (000)                                                                                        | 848                                                               | 1556                                                                |
| Θ range (°)                                                                                           | 2.719–26.353                                                      | 1.767–26.372                                                        |
| <i>h, k, l</i> limits                                                                                 | −18 ≤ <i>h</i> ≤ 17,<br>−21 ≤ <i>k</i> ≤ 14,<br>−9 ≤ <i>l</i> ≤ 9 | −12 ≤ <i>h</i> ≤ 12,<br>−40 ≤ <i>k</i> ≤ 40,<br>−14 ≤ <i>l</i> ≤ 14 |
| Reflections measured, independent and observed [ <i>I</i> > 2σ( <i>I</i> )]                           | 11391, 2183, 2115                                                 | 30499, 14812, 12535                                                 |
| <i>R</i> <sub>int</sub>                                                                               | 0.0198                                                            | 0.0359                                                              |
| <i>R</i> <sub>1</sub> , <i>wR</i> <sub>2</sub> [ <i>F</i> <sup>2</sup> > 2σ( <i>F</i> <sup>2</sup> )] | 0.0341, 0.0885                                                    | 0.0408, 0.0870                                                      |
| <i>R</i> <sub>1</sub> , <i>wR</i> <sub>2</sub> (all data)                                             | 0.0353, 0.0896                                                    | 0.0531, 0.0910                                                      |
| <i>GOOF</i>                                                                                           | 1.063 (1.214)                                                     | 1.031                                                               |
| No. of parameters                                                                                     | 180                                                               | 908                                                                 |
| No. of restraints                                                                                     | 48                                                                | 1                                                                   |
| Δρ <sub>max</sub> , Δρ <sub>min</sub> (e Å <sup>-3</sup> )                                            | 0.46, −0.37                                                       | 0.49, −0.31                                                         |
| CCDC                                                                                                  | 1895786                                                           | 1895787                                                             |

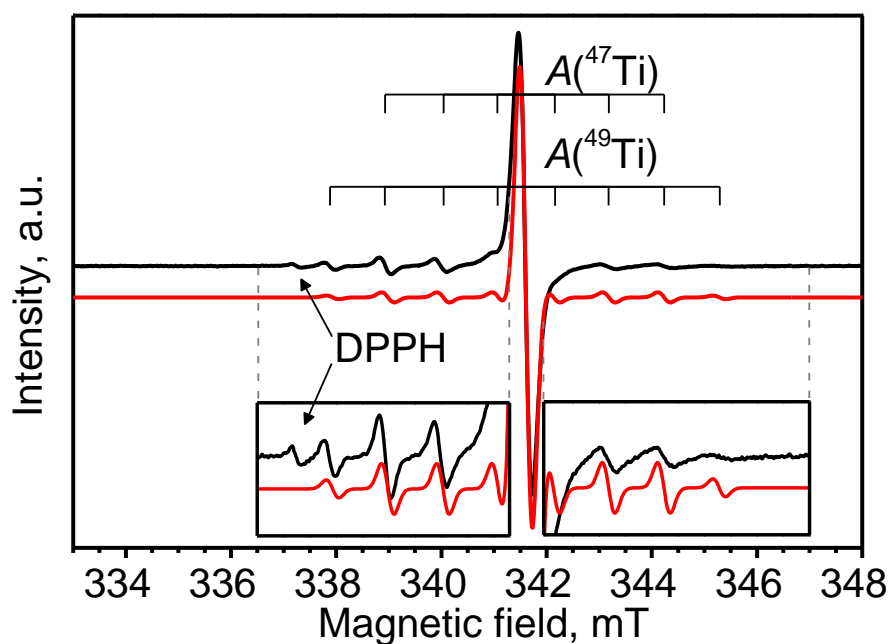

**Fig. S1.** ESR spectrum of THF solution of complex **2** at 300K in X-frequency band (black – experimental spectrum, red – simulation). In insets, the hyperfine structure of the high-gain ESR spectrum is shown.

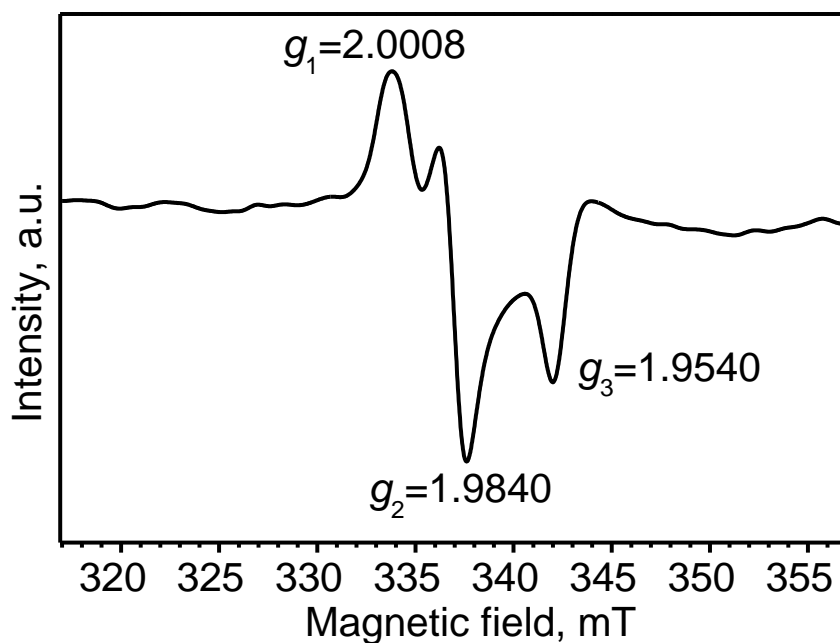

**Fig. S2.** EPR spectrum of frozen THF solution of complex **2** at 77K

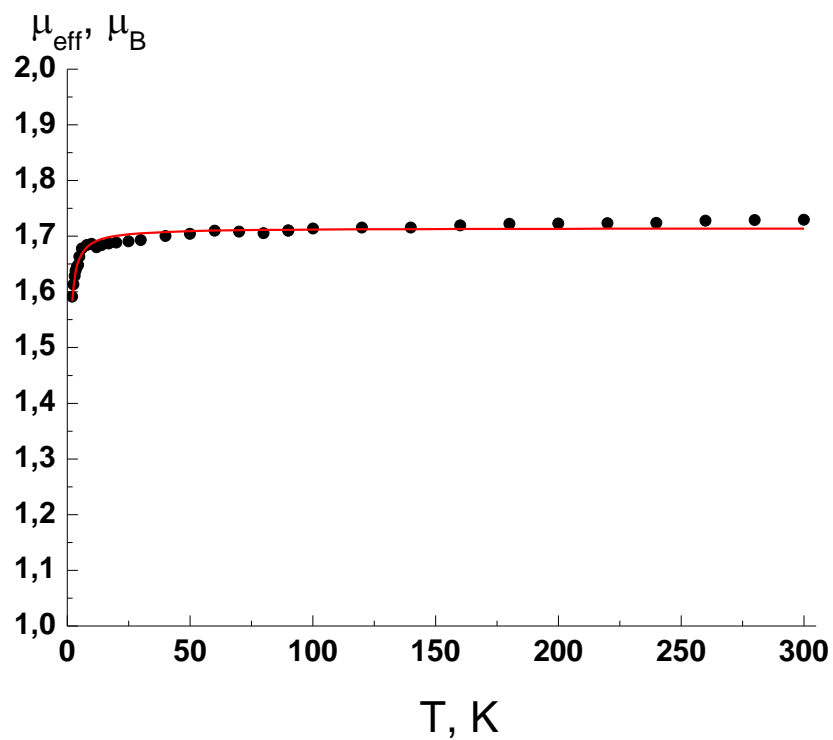

**Fig. S3.**  $\mu_{\text{eff}}$  vs. T plot for the polycrystalline sample of complex **2** (solid line – theoretical curve).

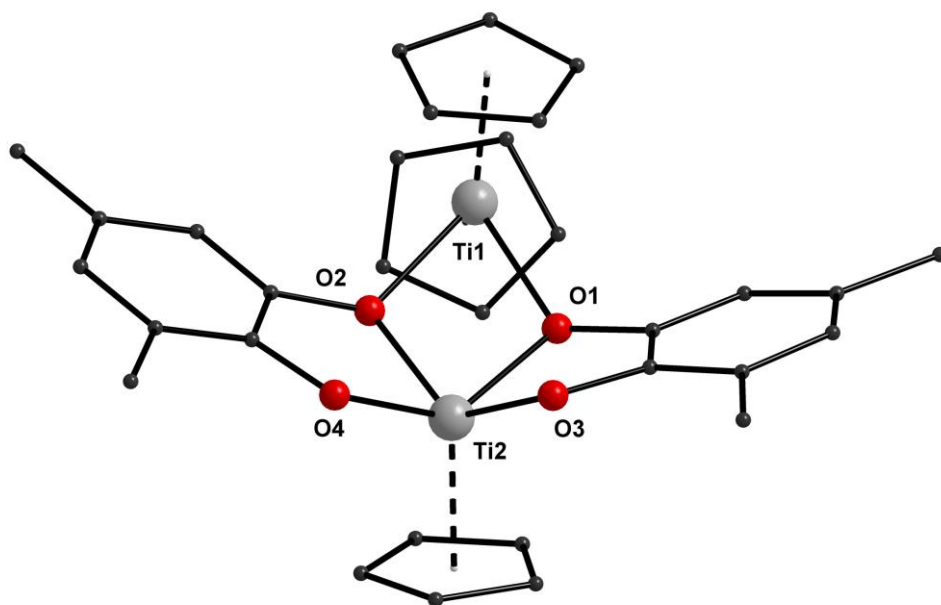

**Fig. S4.** Structure of model complex **2m** used for DFT calculations.

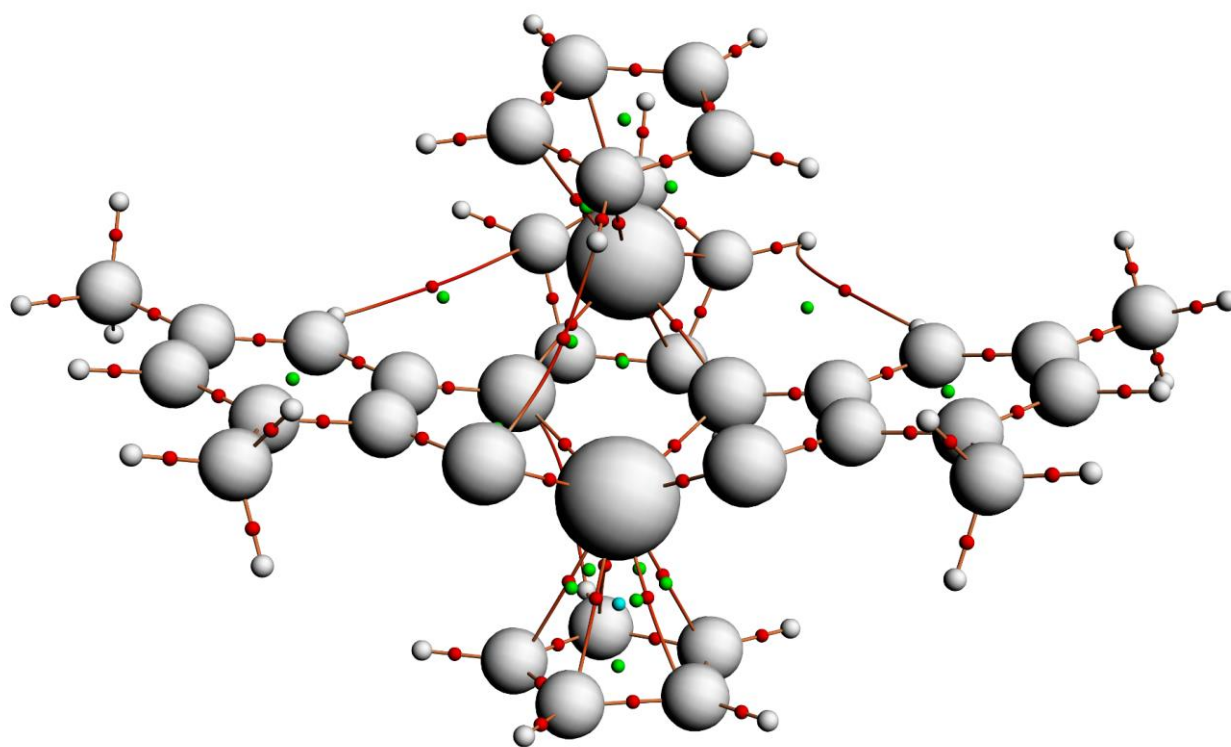

**Fig. S5.** Critical points of electron density in complex **2m**.

**Table S2.** The energy values (eV) and occupations (electrons) of frontier orbitals of **2m**.

|                      | BP86          | B3LYP         | M06L          |
|----------------------|---------------|---------------|---------------|
| LUMO+1               | -3.480 (0.00) | -2.535 (0.00) | -2.903 (0.00) |
| LUMO                 | -3.465 (0.00) | -2.533 (0.00) | -2.894 (0.00) |
| SOMO                 | -3.836 (1.00) | -5.333 (1.00) | -3.616 (1.00) |
| SOMO-1 $\alpha\beta$ | -5.000 (2.00) | -5.505 (2.00) | -4.650 (2.00) |

**Table S3.** Hirshfeld and Bader charge analysis of **2m**.

| Hirshfeld charges | BP86    | B3LYP   | M06L    |
|-------------------|---------|---------|---------|
| Ti1               | 0.3110  | 0.3899  | 0.3630  |
| Ti2               | 0.4701  | 0.5657  | 0.5365  |
| O1                | -0.1824 | -0.2185 | -0.2087 |
| O2                | -0.1815 | -0.2177 | -0.2080 |
| O3                | -0.2060 | -0.2366 | -0.2371 |
| O4                | -0.2051 | -0.2368 | -0.2363 |

| Bader charges | BP86    | B3LYP   | M06L    |
|---------------|---------|---------|---------|
| Ti1           | 1.5555  | 1.6522  | 1.6191  |
| Ti2           | 1.9185  | 2.0564  | 1.9953  |
| O1            | -1.0631 | -1.1273 | -1.0545 |
| O2            | -1.0637 | 1.1217  | -1.0495 |
| O3            | -0.9923 | -1.0341 | -0.9446 |
| O4            | -0.9889 | -1.0441 | -0.9422 |

**Table S4.** BCP properties for Ti bonds, values in a.u.

| Bond    | Distance, Å | BP length, Å | $\rho(r)$ | $\Delta\rho(r)$ | BP86   |         |         |                               |                | $ V(r) /G(r)$ |
|---------|-------------|--------------|-----------|-----------------|--------|---------|---------|-------------------------------|----------------|---------------|
|         |             |              |           |                 | $G(r)$ | $V(r)$  | $H(r)$  | $-\frac{1}{4}\nabla^2\rho(r)$ | $H(r)/\rho(r)$ |               |
| Ti2-C21 | 2,3965      | 2,4228       | 0,0469    | 0,1389          | 0,0406 | -0,0466 | -0,0059 | -0,0347                       | -0,1264        | 1,1458        |
| Ti2-C22 | 2,3812      | 2,4140       | 0,0482    | 0,1475          | 0,0429 | -0,0489 | -0,0060 | -0,0369                       | -0,1249        | 1,1403        |
| Ti2-C23 | 2,3634      | 2,3683       | 0,0500    | 0,1410          | 0,0430 | -0,0508 | -0,0078 | -0,0352                       | -0,1552        | 1,1805        |
| Ti2-C25 | 2,4129      | 2,4205       | 0,0455    | 0,1394          | 0,0399 | -0,0449 | -0,0050 | -0,0348                       | -0,1102        | 1,1257        |
| Ti2-O5  | 1,9062      | 1,9082       | 0,1205    | 0,4661          | 0,1620 | -0,2076 | -0,0455 | -0,1165                       | -0,3778        | 1,2808        |
| Ti2-O6  | 1,9050      | 1,9074       | 0,1202    | 0,4696          | 0,1624 | -0,2073 | -0,0450 | -0,1174                       | -0,3739        | 1,2769        |
| Ti2-O3  | 2,0621      | 2,0631       | 0,0812    | 0,3109          | 0,0956 | -0,1134 | -0,0178 | -0,0777                       | -0,2196        | 1,1866        |
| Ti2-O4  | 2,0613      | 2,0624       | 0,0812    | 0,3126          | 0,0958 | -0,1134 | -0,0176 | -0,0782                       | -0,2173        | 1,1841        |
| Ti1-O3  | 2,1176      | 2,1214       | 0,0638    | 0,2963          | 0,0787 | -0,0832 | -0,0046 | -0,0741                       | -0,0718        | 1,0582        |
| Ti1-O4  | 2,1220      | 2,1247       | 0,0637    | 0,2920          | 0,0778 | -0,0826 | -0,0048 | -0,0730                       | -0,0756        | 1,0618        |
| Ti1-C9  | 2,3505      | 2,3687       | 0,0496    | 0,1593          | 0,0458 | -0,0518 | -0,0060 | -0,0398                       | -0,1204        | 1,1304        |
| Ti1-C10 | 2,3481      | 2,3521       | 0,0523    | 0,1430          | 0,0448 | -0,0539 | -0,0091 | -0,0358                       | -0,1736        | 1,2025        |
| Ti1-C12 | 2,3603      | 2,3669       | 0,0485    | 0,1576          | 0,0448 | -0,0502 | -0,0054 | -0,0394                       | -0,1110        | 1,1202        |
| Ti1-C13 | 2,3675      | 2,3713       | 0,0494    | 0,1390          | 0,0423 | -0,0498 | -0,0075 | -0,0348                       | -0,1520        | 1,1777        |
| Ti1-C16 | 2,3688      | 2,3854       | 0,0499    | 0,1408          | 0,0429 | -0,0505 | -0,0077 | -0,0352                       | -0,1536        | 1,1787        |

**Table S4 (continued)**

| Bond    | Distance, Å | BP length, Å | $\rho(r)$ | $\Delta\rho(r)$ | B3LYP  |         |         |                               |                | $ V(r) /G(r)$ |
|---------|-------------|--------------|-----------|-----------------|--------|---------|---------|-------------------------------|----------------|---------------|
|         |             |              |           |                 | $G(r)$ | $V(r)$  | $H(r)$  | $-\frac{1}{4}\nabla^2\rho(r)$ | $H(r)/\rho(r)$ |               |
| Ti2-C25 | 2,4452      | 2,4993       | 0,0472    | 0,1277          | 0,0390 | -0,0461 | -0,0071 | -0,0319                       | -0,1497        | 1,1812        |
| Ti2-C23 | 2,3931      | 2,3997       | 0,0425    | 0,1281          | 0,0362 | -0,0404 | -0,0042 | -0,0320                       | -0,0990        | 1,1162        |
| Ti2-C21 | 2,4467      | 2,4824       | 0,0422    | 0,1259          | 0,0357 | -0,0399 | -0,0042 | -0,0315                       | -0,0994        | 1,1176        |
| Ti2-O5  | 1,8892      | 1,8914       | 0,1260    | 0,4838          | 0,1716 | -0,2223 | -0,0507 | -0,1209                       | -0,4020        | 1,2952        |
| Ti2-O6  | 1,8918      | 1,8940       | 0,1252    | 0,4805          | 0,1701 | -0,2200 | -0,0499 | -0,1201                       | -0,3988        | 1,2936        |
| Ti2-O3  | 2,0667      | 2,0675       | 0,0801    | 0,3088          | 0,0942 | -0,1112 | -0,0170 | -0,0772                       | -0,2122        | 1,1804        |
| Ti2-O4  | 2,0619      | 2,0627       | 0,0809    | 0,3133          | 0,0957 | -0,1131 | -0,0174 | -0,0783                       | -0,2145        | 1,1814        |
| Ti1-O3  | 2,1607      | 2,1681       | 0,0560    | 0,2705          | 0,0686 | -0,0697 | -0,0010 | -0,0676                       | -0,0182        | 1,0149        |
| Ti1-O4  | 2,1537      | 2,1605       | 0,0571    | 0,2755          | 0,0703 | -0,0716 | -0,0014 | -0,0689                       | -0,0241        | 1,0196        |
| Ti1-C8  | 2,4583      | 2,4704       | 0,0400    | 0,1258          | 0,0344 | -0,0373 | -0,0029 | -0,0315                       | -0,0734        | 1,0854        |
| Ti1-C10 | 2,4123      | 2,4179       | 0,0459    | 0,1248          | 0,0377 | -0,0442 | -0,0065 | -0,0312                       | -0,1417        | 1,1725        |
| Ti1-C12 | 2,4164      | 2,4225       | 0,0428    | 0,1434          | 0,0390 | -0,0421 | -0,0031 | -0,0359                       | -0,0723        | 1,0795        |
| Ti1-C13 | 2,4114      | 2,4158       | 0,0451    | 0,1243          | 0,0371 | -0,0432 | -0,0061 | -0,0311                       | -0,1343        | 1,1632        |
| Ti1-C16 | 2,4259      | 2,4630       | 0,0444    | 0,1249          | 0,0368 | -0,0423 | -0,0056 | -0,0312                       | -0,1253        | 1,1511        |



**Table S4 (continued)**

| Bond    | Distance, Å | BP length, Å | $\rho(r)$ | $\Delta\rho(r)$ | M06L   |         |         |                               |                | $ V(r) /G(r)$ |
|---------|-------------|--------------|-----------|-----------------|--------|---------|---------|-------------------------------|----------------|---------------|
|         |             |              |           |                 | $G(r)$ | $V(r)$  | $H(r)$  | $-\frac{1}{4}\nabla^2\rho(r)$ | $H(r)/\rho(r)$ |               |
| Ti2-C21 | 2,3967      | 2,4070       | 0,0457    | 0,1389          | 0,0400 | -0,0452 | -0,0052 | -0,0347                       | -0,1141        | 1,1307        |
| Ti2-C22 | 2,3820      | 2,3940       | 0,0472    | 0,1455          | 0,0419 | -0,0475 | -0,0056 | -0,0364                       | -0,1178        | 1,1325        |
| Ti2-C23 | 2,3605      | 2,3643       | 0,0492    | 0,1417          | 0,0426 | -0,0497 | -0,0071 | -0,0354                       | -0,1451        | 1,1676        |
| Ti2-C24 | 2,3795      | 2,3999       | 0,0474    | 0,1421          | 0,0415 | -0,0475 | -0,0060 | -0,0355                       | -0,1266        | 1,1446        |
| Ti2-C25 | 2,4022      | 2,4085       | 0,0455    | 0,1394          | 0,0399 | -0,0449 | -0,0050 | -0,0349                       | -0,1104        | 1,1260        |
| Ti2-O5  | 1,8927      | 1,8945       | 0,1162    | 0,5309          | 0,1679 | -0,2031 | -0,0352 | -0,1327                       | -0,3030        | 1,2097        |
| Ti2-O6  | 1,8927      | 1,8946       | 0,1160    | 0,5319          | 0,1679 | -0,2028 | -0,0349 | -0,1330                       | -0,3010        | 1,2080        |
| Ti2-O3  | 2,0510      | 2,0519       | 0,0784    | 0,3553          | 0,1004 | -0,1120 | -0,0116 | -0,0888                       | -0,1481        | 1,1156        |
| Ti2-O4  | 2,0536      | 2,0544       | 0,0778    | 0,3528          | 0,0995 | -0,1109 | -0,0113 | -0,0882                       | -0,1457        | 1,1139        |
| Ti1-O3  | 2,1426      | 2,1472       | 0,0564    | 0,3042          | 0,0745 | -0,0730 | 0,0015  | -0,0760                       | 0,0271         | 0,9795        |
| Ti1-O4  | 2,1451      | 2,1490       | 0,0563    | 0,3016          | 0,0740 | -0,0726 | 0,0014  | -0,0754                       | 0,0249         | 0,9811        |
| Ti1-C8  | 2,4053      | 2,4125       | 0,0442    | 0,1396          | 0,0392 | -0,0434 | -0,0043 | -0,0349                       | -0,0961        | 1,1086        |
| Ti1-C9  | 2,3503      | 2,3650       | 0,0489    | 0,1614          | 0,0457 | -0,0510 | -0,0053 | -0,0403                       | -0,1093        | 1,1170        |
| Ti1-C10 | 2,3431      | 2,3457       | 0,0523    | 0,1404          | 0,0444 | -0,0537 | -0,0093 | -0,0351                       | -0,1776        | 1,2091        |
| Ti1-C12 | 2,3548      | 2,3592       | 0,0482    | 0,1604          | 0,0451 | -0,0500 | -0,0050 | -0,0401                       | -0,1030        | 1,1102        |
| Ti1-C13 | 2,3500      | 2,3522       | 0,0509    | 0,1377          | 0,0430 | -0,0516 | -0,0086 | -0,0344                       | -0,1686        | 1,1994        |
| Ti1-C16 | 2,3719      | 2,3873       | 0,0487    | 0,1398          | 0,0420 | -0,0490 | -0,0070 | -0,0349                       | -0,1441        | 1,1673        |

$G(r)$  — kinetic energy densities at the bcp were estimated using the Abramov's approximation [1]

$$G(r) = 3/10(3\pi^2)^{2/3} \rho^{5/3}(r) + 1/6\nabla^2\rho(r)$$

$V(r)$  — potential energy densities at the BCP from local virial theorem

$$V(r) + 2G(r) = -\frac{1}{4}\nabla^2 \rho(r)$$

$H(r)$  — total energy densities, the sum of the  $G(r)$ , a positive quantity, and the  $V(r)$ , a negative quantity [2,3]

If  $r$  is bcp,

$$H(r) = G(r) + V(r)$$

**Table S5.** Cartesian coordinates (in Å) of **2m** (BP86).

|    |            |            |            |
|----|------------|------------|------------|
| Ti | 4.27705931 | 6.33456484 | 3.21541726 |
| O  | 5.77218113 | 6.60440127 | 4.69048227 |
| O  | 5.71330499 | 7.73126307 | 2.51592877 |
| C  | 3.11092547 | 8.45788150 | 3.38393769 |
| C  | 3.25077260 | 7.94012226 | 4.68997408 |
| C  | 2.54455928 | 6.70432688 | 4.76032857 |
| C  | 1.94953818 | 6.48225457 | 3.48778132 |
| C  | 2.32772053 | 7.55005689 | 2.62318708 |
| C  | 4.71490558 | 5.12623764 | 1.23566409 |
| C  | 5.71712563 | 4.76333037 | 2.18457489 |
| C  | 5.08445852 | 4.07706659 | 3.25805243 |
| C  | 3.69746870 | 4.03156850 | 2.98940245 |
| C  | 3.47042442 | 4.67109233 | 1.73445246 |
| Ti | 7.39592044 | 7.29735133 | 3.62479358 |
| C  | 6.16358952 | 5.69470096 | 5.62680826 |
| C  | 5.99317561 | 7.91799386 | 1.19537923 |
| H  | 3.60410198 | 9.34820243 | 2.99837479 |
| H  | 3.86607128 | 8.36454324 | 5.48083283 |
| H  | 2.44662010 | 6.06331376 | 5.63457144 |
| H  | 1.33045235 | 5.63042112 | 3.21649023 |
| H  | 2.04952416 | 7.65642519 | 1.57565151 |
| H  | 4.88058091 | 5.67251858 | 0.30799204 |
| H  | 6.78047478 | 4.97780408 | 2.10351156 |
| H  | 5.57392794 | 3.69795712 | 4.15430386 |
| H  | 2.93612788 | 3.60174737 | 3.63909460 |

|   |             |             |             |
|---|-------------|-------------|-------------|
| H | 2.50376834  | 4.81192576  | 1.25404371  |
| O | 8.10495430  | 5.67486471  | 4.33084881  |
| O | 8.06314376  | 7.07830710  | 1.85391011  |
| C | 7.46077534  | 5.18394471  | 5.41560028  |
| C | 7.29875788  | 7.53634501  | 0.83555409  |
| C | 6.96826473  | 9.46506577  | 4.55285719  |
| C | 7.94534455  | 9.61258378  | 3.53564748  |
| C | 9.10496703  | 8.89893977  | 3.94077526  |
| C | 8.84679111  | 8.32747890  | 5.21876928  |
| C | 7.52930403  | 8.68063291  | 5.59734099  |
| C | 5.36998944  | 5.24127840  | 6.67567620  |
| C | 5.08786583  | 8.38987401  | 0.24911443  |
| C | 7.97775898  | 4.18762005  | 6.25389982  |
| C | 7.71856162  | 7.60886283  | -0.49942626 |
| H | 5.94423375  | 9.83196165  | 4.50869770  |
| H | 7.79988267  | 10.10150180 | 2.57244840  |
| H | 10.00947781 | 8.76446091  | 3.34939182  |
| H | 9.51545316  | 7.67370588  | 5.77593509  |
| H | 7.00748989  | 8.32801635  | 6.48615205  |
| C | 5.87378998  | 4.25047130  | 7.53386898  |
| H | 4.36696311  | 5.65227307  | 6.81755642  |
| C | 5.49009994  | 8.47734760  | -1.09295198 |
| H | 4.07688796  | 8.67244284  | 0.55475827  |
| C | 7.16119005  | 3.74021130  | 7.30432177  |
| C | 9.34631199  | 3.62529605  | 5.99061528  |
| C | 6.79188803  | 8.08259543  | -1.44123391 |
| C | 9.10881123  | 7.17701175  | -0.87208379 |

|   |             |            |             |
|---|-------------|------------|-------------|
| C | 5.05412904  | 3.77249627 | 8.70622330  |
| C | 4.52148552  | 8.94799257 | -2.14965653 |
| H | 7.54878870  | 2.96075891 | 7.96975747  |
| H | 5.36513242  | 2.76302361 | 9.02237904  |
| H | 3.98009273  | 3.73775918 | 8.45558020  |
| H | 5.17485651  | 4.44944961 | 9.57234806  |
| H | 7.10238098  | 8.14712199 | -2.49010518 |
| H | 9.41080107  | 3.22508834 | 4.96369877  |
| H | 9.58246185  | 2.81764477 | 6.70192990  |
| H | 10.11857478 | 4.40961404 | 6.07902399  |
| H | 9.86375082  | 7.81033242 | -0.37355452 |
| H | 9.29368624  | 6.13808689 | -0.54791644 |
| H | 9.26056179  | 7.24056976 | -1.96159599 |
| H | 5.05336361  | 9.41867650 | -2.99331249 |
| H | 3.81208377  | 9.68613320 | -1.73887655 |
| H | 3.93349400  | 8.10286524 | -2.55379155 |

**Table S6.** Cartesian coordinates (in Å) of **2m** (B3LYP).

|    |            |            |            |
|----|------------|------------|------------|
| Ti | 4.16458193 | 6.30644610 | 3.23535751 |
| O  | 5.79526808 | 6.47086124 | 4.64327902 |
| O  | 5.71139672 | 7.58180852 | 2.44835528 |
| C  | 3.11678094 | 8.53438152 | 3.45644137 |
| C  | 3.27570895 | 8.02128586 | 4.75595753 |
| C  | 2.47667249 | 6.85799464 | 4.87249567 |
| C  | 1.81417788 | 6.66935208 | 3.63928981 |
| C  | 2.22786458 | 7.69260465 | 2.75263694 |
| C  | 4.45597977 | 4.97899000 | 1.23732600 |
| C  | 5.41827785 | 4.53819491 | 2.17887047 |
| C  | 4.73363884 | 3.93642456 | 3.25960431 |
| C  | 3.35323375 | 4.02244952 | 3.00060056 |
| C  | 3.18178975 | 4.66309369 | 1.74596163 |
| Ti | 7.38533264 | 7.30492662 | 3.61992201 |
| C  | 6.22724061 | 5.57979427 | 5.57907700 |
| C  | 6.04887933 | 7.81916164 | 1.15023573 |
| H  | 3.62460001 | 9.39570663 | 3.04812134 |
| H  | 3.92383775 | 8.42021846 | 5.52202333 |
| H  | 2.35570791 | 6.25052585 | 5.75810664 |
| H  | 1.10349984 | 5.88766875 | 3.41599263 |
| H  | 1.89008005 | 7.82773521 | 1.73451610 |
| H  | 4.66673989 | 5.47350862 | 0.29993210 |
| H  | 6.49009898 | 4.63491928 | 2.08327024 |
| H  | 5.18842886 | 3.50636150 | 4.14029618 |
| H  | 2.56449731 | 3.64975118 | 3.63927385 |

|   |             |             |             |
|---|-------------|-------------|-------------|
| H | 2.23882761  | 4.86522494  | 1.25786301  |
| O | 8.19578012  | 5.77039490  | 4.36651123  |
| O | 8.09939163  | 7.02632868  | 1.89036079  |
| C | 7.56158551  | 5.18793798  | 5.40742246  |
| C | 7.37892159  | 7.49523454  | 0.84891329  |
| C | 6.92741794  | 9.60076563  | 4.33124940  |
| C | 8.00737456  | 9.64275354  | 3.42669470  |
| C | 9.08807414  | 8.94103166  | 4.00830551  |
| C | 8.67909371  | 8.48681360  | 5.28431836  |
| C | 7.34345071  | 8.88980547  | 5.48154153  |
| C | 5.46243270  | 5.05806673  | 6.60976832  |
| C | 5.19999642  | 8.31601710  | 0.17491962  |
| C | 8.14419469  | 4.24215985  | 6.24821960  |
| C | 7.87281970  | 7.63705815  | -0.44582838 |
| H | 5.94602117  | 10.01950456 | 4.16336016  |
| H | 7.99515190  | 10.08750191 | 2.44118216  |
| H | 10.05031492 | 8.76374376  | 3.54881076  |
| H | 9.27130588  | 7.89672924  | 5.96849763  |
| H | 6.73536049  | 8.66014508  | 6.34501636  |
| C | 6.02611100  | 4.11506942  | 7.47582468  |
| H | 4.43466233  | 5.38006418  | 6.73855451  |
| C | 5.67405840  | 8.47851301  | -1.13152516 |
| H | 4.17613455  | 8.57320107  | 0.42641883  |
| C | 7.34957340  | 3.72113345  | 7.27450378  |
| C | 9.56679802  | 3.81008495  | 6.02798536  |
| C | 6.99458964  | 8.13017099  | -1.41680594 |
| C | 9.29349204  | 7.25919112  | -0.75835402 |

|   |             |             |             |
|---|-------------|-------------|-------------|
| C | 5.21989596  | 3.56421186  | 8.62521415  |
| C | 4.76774957  | 9.03629719  | -2.20026785 |
| H | 7.78599284  | 2.98313311  | 7.94263290  |
| H | 5.66234680  | 2.64367846  | 9.01466931  |
| H | 4.19305679  | 3.33721529  | 8.32156744  |
| H | 5.16913757  | 4.28309454  | 9.45155690  |
| H | 7.36204430  | 8.24935572  | -2.43274120 |
| H | 9.70133982  | 3.40637929  | 5.01944751  |
| H | 9.85848599  | 3.04188348  | 6.74815577  |
| H | 10.25706399 | 4.65393682  | 6.12880098  |
| H | 10.00016541 | 7.87457659  | -0.19196416 |
| H | 9.48944395  | 6.21666429  | -0.48852289 |
| H | 9.50698053  | 7.38540468  | -1.82249454 |
| H | 5.24093726  | 8.99031605  | -3.18428371 |
| H | 4.51890730  | 10.08478670 | -2.00041337 |
| H | 3.82673961  | 8.47882109  | -2.25800163 |



**Table S7.** Cartesian coordinates (in Å) of **2m** (M06L).

|    |            |            |            |
|----|------------|------------|------------|
| Ti | 4.18446030 | 6.29171033 | 3.21628776 |
| O  | 5.79296055 | 6.47505126 | 4.61978906 |
| O  | 5.71730091 | 7.58344476 | 2.45253700 |
| C  | 3.17616263 | 8.47302843 | 3.47532285 |
| C  | 3.29605276 | 7.91422571 | 4.75373001 |
| C  | 2.50888028 | 6.74138403 | 4.80181795 |
| C  | 1.88495709 | 6.60002335 | 3.54399359 |
| C  | 2.32146200 | 7.65364987 | 2.70972727 |
| C  | 4.51715283 | 5.04215656 | 1.24830374 |
| C  | 5.48955883 | 4.62862177 | 2.19000395 |
| C  | 4.82249958 | 3.99767787 | 3.26140454 |
| C  | 3.44496948 | 4.03750157 | 2.99759583 |
| C  | 3.25735685 | 4.67482137 | 1.74933479 |
| Ti | 7.38946847 | 7.26154164 | 3.60033785 |
| C  | 6.20045446 | 5.61552803 | 5.58064978 |
| C  | 6.03529916 | 7.83596883 | 1.16324989 |
| H  | 3.70825073 | 9.33547509 | 3.11004005 |
| H  | 3.93451239 | 8.27291441 | 5.54427505 |
| H  | 2.37043838 | 6.09756607 | 5.65389593 |
| H  | 1.20440294 | 5.81494811 | 3.26461549 |
| H  | 2.02663569 | 7.81769008 | 1.68656316 |
| H  | 4.70905174 | 5.55884639 | 0.32260347 |
| H  | 6.55422038 | 4.78746505 | 2.11352297 |
| H  | 5.28541706 | 3.59655808 | 4.14779047 |
| H  | 2.66666733 | 3.66411770 | 3.64251942 |

|   |            |             |             |
|---|------------|-------------|-------------|
| H | 2.31012173 | 4.87043862  | 1.27545255  |
| O | 8.16044159 | 5.70671956  | 4.35559825  |
| O | 8.07748314 | 7.00160640  | 1.85636704  |
| C | 7.52892557 | 5.19589139  | 5.42554809  |
| C | 7.35903267 | 7.50746498  | 0.84054091  |
| C | 6.88810939 | 9.43827429  | 4.46900614  |
| C | 7.84239946 | 9.59501669  | 3.44715950  |
| C | 9.02439855 | 8.94495324  | 3.85581687  |
| C | 8.80215385 | 8.40140810  | 5.13885094  |
| C | 7.48263011 | 8.70653148  | 5.51710260  |
| C | 5.41704523 | 5.13860010  | 6.61529552  |
| C | 5.17277300 | 8.34542773  | 0.20963407  |
| C | 8.09604566 | 4.28895973  | 6.31446998  |
| C | 7.84108183 | 7.68629666  | -0.45174771 |
| H | 5.86638451 | 9.77744821  | 4.43474776  |
| H | 7.67617958 | 10.06101596 | 2.48931483  |
| H | 9.92332458 | 8.84389415  | 3.27127901  |
| H | 9.49970777 | 7.80661255  | 5.70416916  |
| H | 6.99212966 | 8.37835152  | 6.41901249  |
| C | 5.96646384 | 4.22820804  | 7.52007445  |
| H | 4.39164535 | 5.47115090  | 6.71219095  |
| C | 5.63613766 | 8.53511658  | -1.09361711 |
| H | 4.15263463 | 8.58724875  | 0.47999341  |
| C | 7.28781591 | 3.82264408  | 7.35142141  |
| C | 9.50908597 | 3.84380382  | 6.13070646  |
| C | 6.95393828 | 8.20252433  | -1.39648584 |
| C | 9.25173135 | 7.32695941  | -0.78276791 |

|   |             |            |             |
|---|-------------|------------|-------------|
| C | 5.14757478  | 3.71924623 | 8.66678716  |
| C | 4.71886589  | 9.07663890 | -2.14747257 |
| H | 7.70993456  | 3.11344816 | 8.05334173  |
| H | 5.61677601  | 2.86075883 | 9.14028389  |
| H | 4.14989956  | 3.42176361 | 8.34774195  |
| H | 5.01809251  | 4.48360198 | 9.43362865  |
| H | 7.31070422  | 8.35281372 | -2.40840963 |
| H | 9.65344885  | 3.38409400 | 5.15399125  |
| H | 9.79970788  | 3.12729242 | 6.89384079  |
| H | 10.19777286 | 4.68738070 | 6.17337167  |
| H | 9.95693475  | 7.88997721 | -0.17194386 |
| H | 9.44776343  | 6.27480626 | -0.58077010 |
| H | 9.47364375  | 7.52214513 | -1.82819187 |
| H | 5.26001650  | 9.32101147 | -3.05775255 |
| H | 4.20791802  | 9.97764069 | -1.81119140 |
| H | 3.94422752  | 8.35601893 | -2.41140020 |

## References

---

1. Y.A. Abramov, *Acta Cryst.* 1997, **A53**, 264.
2. R.F.W. Bader, *Atoms in Molecules. A Quantum Theory* (Clarendon, Oxford, 1990).
3. P. Popelier, *Atoms in Molecules. An Introduction* (Prentice-Hall, Harlow, UK, 2000).
